# Supplementary material for: Impact of intercropping grass on the soil rhizosphere microbial community and soil ecosystem function in a walnut orchard
Source: Frontiers journal article supplement (doi:10.3389/fmicb.2023.1137590), 2023-03-14

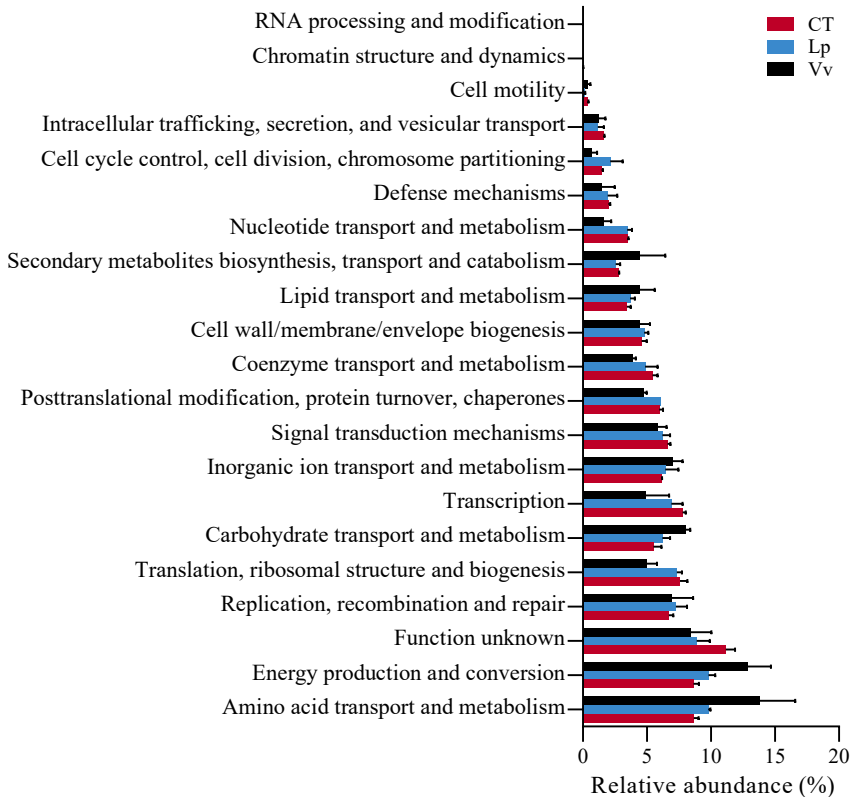

Supplement: Data_Sheet_3.PDF [file Data_Sheet_3.PDF]
